# Supplementary material for: Enhancing fraud detection in the Ethereum blockchain using ensemble learning
Source: PeerJ Comput Sci. 2025 Feb 18;11:e2716. doi: 10.7717/peerj-cs.2716 (PMC11888915; doi:10.7717/peerj-cs.2716)
Supplement: Supplemental Information 2 [file peerj-cs-11-2716-s002.xlsx]

## Sheet: Sheet1
For Fraud Class							For Fraud Class: grid search						ensemble learning: fraud
	accuracy	precision	recall	f1-score				accuracy	precision	recall	f1-score			accuracy	precision	recall	f1-score
recurrent neural network	0.86	0.64	0.82	0.72			recurrent neural network	0.79	0.7	0.07	0.13		Voting	0.99	0.98	0.97	0.98
Logistic regression	0.94	0.81	0.92	0.86			Logistic regression	0.94	0.81	0.94	0.96		Stacking	0.99	0.98	0.97	0.97
Local outlier factor	0.73	0.22	0.1	0.14			Local outlier factor	0.77	0.37	0.09	0.14		Boosting	0.98	0.98	0.95	0.96
Isolation forest	0.66	0.37	0.82	0.51			Isolation forest	0.28	0.23	0.98	0.37
Support vector machine	0.57	0.26	0.55	0.35			Support vector machine	0.98	0.92	0.97	0.94
Random forest	0.99	0.98	0.95	0.97			Random forest	0.99	0.98	0.95	0.97
XGBoost	0.99	0.97	0.97	0.97			XGBoost	0.99	0.96	0.98	0.97
For normal Class							For normal Class						For normal Class
	accuracy	precision	recall	f1-score				accuracy	precision	recall	f1-score			accuracy	precision	recall	f1-score		Best Parameter
recurrent neural network	0.86	0.96	0.85	0.9			recurrent neural network	0.79	0.8	0.99	0.88		Voting	0.99	0.99	0.99	0.99		Model Name:	Parameters
Logistic regression	0.94	0.98	0.94	0.96			Logistic regression	0.94	0.98	0.94	0.96		Stacking	0.99	0.99	0.99	0.99		SVM	C=10	gamma=scale	kernel=rbf
Local outlier factor	0.77	0.37	0.9	0.14			Local outlier factor	0.77	0.79	0.96	0.87		Boosting	0.98	0.99	0.99	0.99		Random Forest	max_depth=None	max features = auto	min samples leaf = 1	min samples split = 2	n estimators =100
Isolation forest	0.66	0.92	0.63	0.75			Isolation forest	0.28	0.93	0.08	0.15								XGBoost	colsample_bytree = 0.7	learning_rate = 0.5	max_depth = 4	n_estimators=200	sub_sample =0.9
Support vector machine	0.57	0.82	0.58	0.68			Support vector machine	0.98	0.99	0.98	0.98
Random forest	0.99	0.99	1	0.99			Random forest	0.99	0.99	0.99	0.99
XGBoost	0.99	0.99	0.99	0.99			XGBoost	0.99	0.99	0.99	0.99
Training time & Testing time							Training time & Testing time(grid Search)						Training time & Testing time(ensenble)
	training time	testing time						training time	testing time					training time	testing time
recurrent neural network	8.88	0.5					recurrent neural network	40.17	0.45				Voting	134	0.13
Logistic regression	0.09	0					Logistic regression	1.13	0				Stacking	987.09	0.37
Local outlier factor	0.18	0.1					Local outlier factor	8.5	0.19				Boosting	3.999	0.018
Isolation forest	0.07	0.05					Isolation forest	41.67	0.05
Support vector machine	2.21	0.25					Support vector machine	77.83	0.08
Random forest	1.52	0.01					Random forest	1572.38	0.03
XGBoost	0.32	0					XGBoost	408.53	0
Papper1:
	accuracy	precision	recall	f1-score
Logistic regression	84.92	92.64	88.53	56.85
Random forest	98.26	98.54	90.78	94.43
XGBoost	97.99	97.07	93.5	95.38

## Sheet: Sheet2
ref	Year	Approach	accuracy	precision	recall	f1-score	training time	Testing time	Source Code
1		Optimizing LGBM hyperparameters using Euclidean distance as the loss function with random search	0.99	0.97	0.93	0.95	No	No	No
2		Optimizing LGBM hyperparameters with random search	0.99	0.99	0.99	0.99	No	No	No
3		Hyperparameter tuning of a DLANN model using a genetic algorithm and cuckoo search	0.99	0.96	0.94	0.97	No	No	No
4		A stacking classifier model using Multinomial Naive Bayes and Random Forest as base learners, with logistic regression as the meta-learner.	0.97	0.97	0.97	0.97	No	No	No
5		An Extreme Gradient Boosting model using K-Means SMOTE for oversampling.	0.98	0.98	0.97	0.97	No	0.235	No
		Voting	0.99	0.98	0.97	0.98	134	0.13
		Stacking	0.99	0.98	0.97	0.97	987.09	0.37
		Boosting	0.98	0.98	0.95	0.96	3.999	0.018
